# Supplementary material for: Three-Year Retention in Buprenorphine Treatment for Opioid Use Disorder Among Privately Insured Adults
Source: Atypon-hosted journal article supplement (doi:10.1176/appi.ps.201700363), 2018-04-16

Figure 1: Kaplan Meir Survival analysis on probability of retention in buprenorphine treatment among patients with opioid use disorder initiated on buprenorphine in 2011: Impact of inpatient hospital mental health admissions

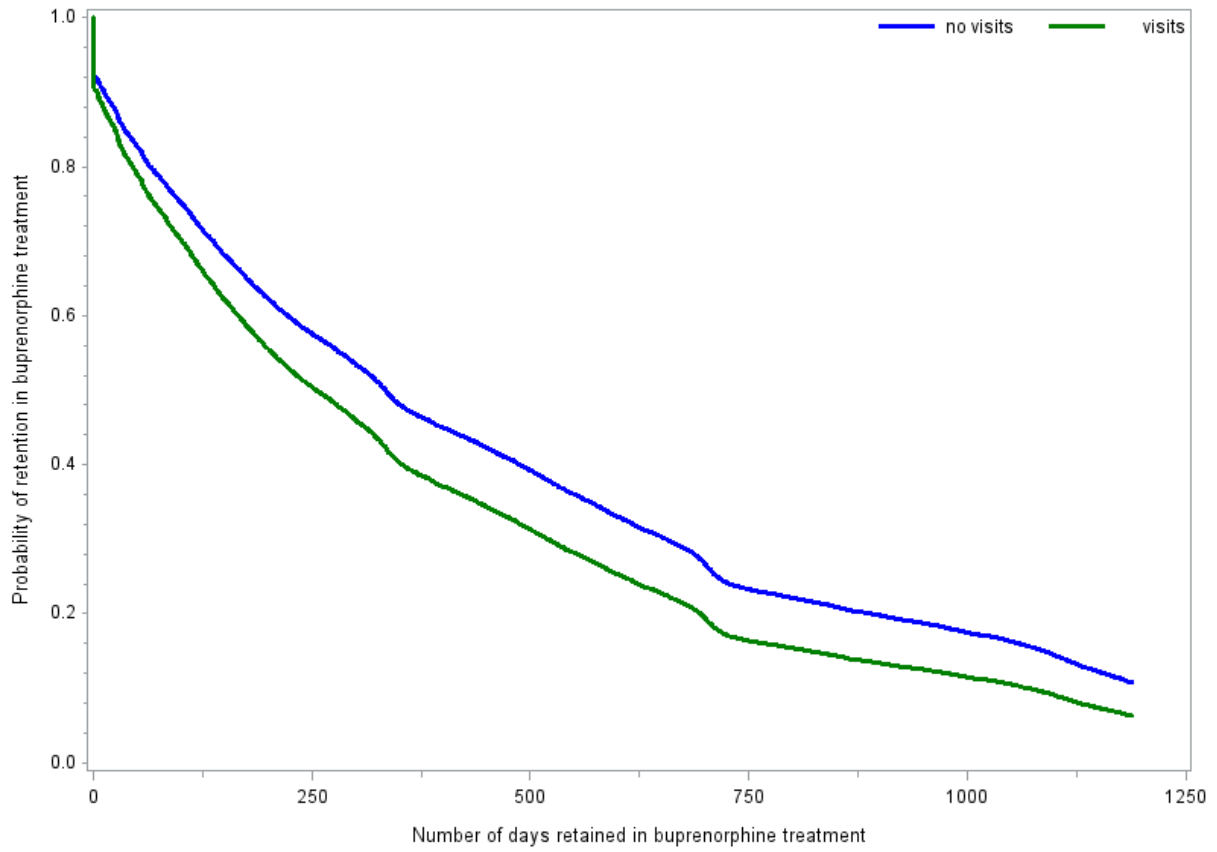

Figure 2: Kaplan Meir Survival analysis on probability of retention in buprenorphine treatment among patients with opioid use disorder initiated on buprenorphine in 2011: Impact of receipt of outpatient psychotherapy

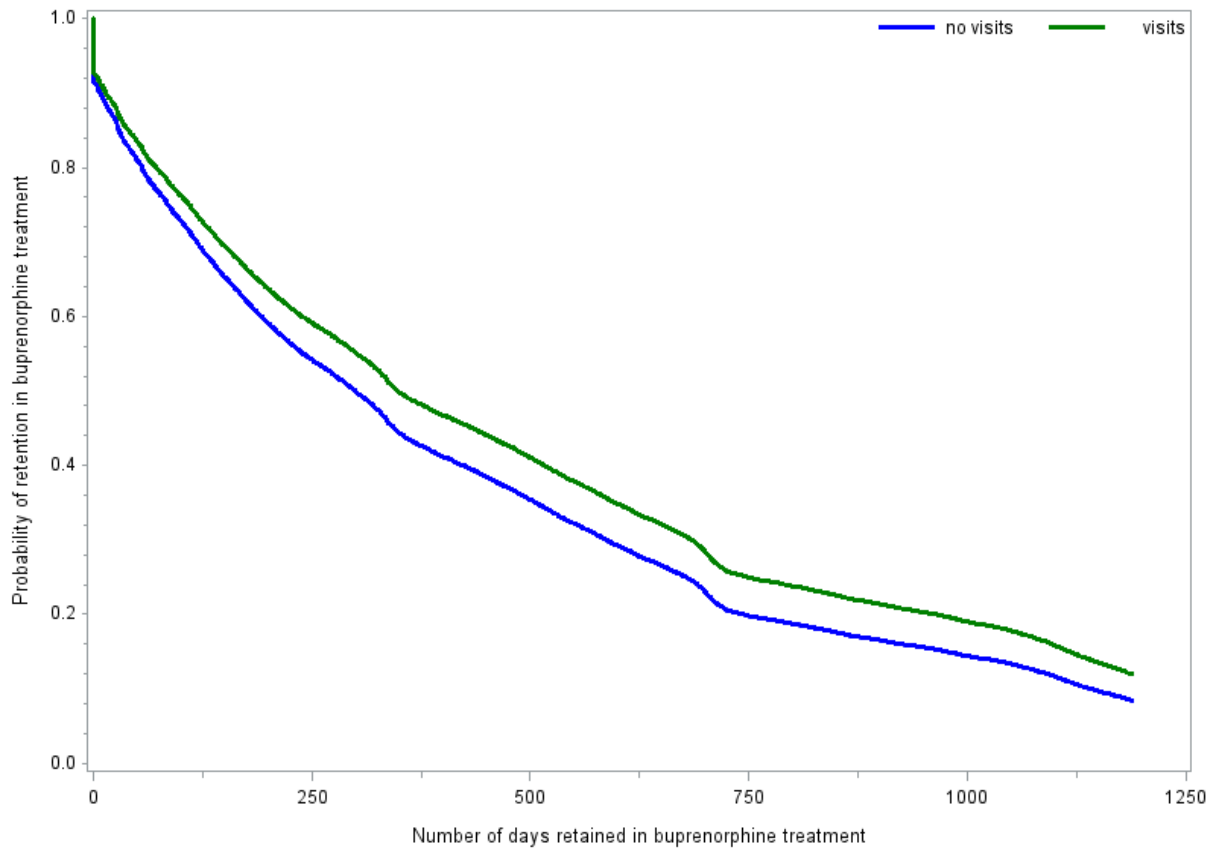

Supplement: appi.ps.201700363.ds001.pdf [file appi.ps.201700363.ds001.pdf]
